# Supplementary material for: Formation of giant vesicles from diacylmannosylerythritols, and their binding to concanavalin A
Source: Royal Society of Chemistry journal article supplement (doi:10.1039/b000968g), 2000-01-01
Supplement: b000968g.doc [file b000968g.doc]

**Supplementary data**

*Preparation of MELs*

A seed culture (1.5 mL) of the yeast strain *Candida antarctica* T-34 was transferred to 300-mL erlenmeyer flasks containing 30 mL of a fermentation medium [5% (v/v) methyl tetradecanoate, 0.2% NaNO3, 0.02% MgSO47H2O, 0.02% KH2PO4, 0.1% yeast extract and distilled water], followed by incubation on a rotatory shaker (220 rpm) at 30° C for seven days. The culture broth (30 mL) was then extracted twice with 30-mL portions of ethyl acetate. The layer was separated, and the organic layer was washed with brine and concentrated under reduced pressure. The resulting yellow oil (555 mg) was dissolved in chloroform (5 mL) and placed on a column (3 x 40 cm) of silica-gel (50 g). The mixture of MELs was then chromatographed with a close gradient elution of chloroform-acetone (10:0 to 10:10). Each fraction was collected and again chromatographed as above to give MEL-A (284 mg), MEL-B (111 mg) and MEL-C (44 mg) as colorless oils.

*NMR study*

NMR spectral data of MEL-A, -B and -C are summarized in Table 1. NMR spectra were recorded in CDCl3 on a Bruker ARX (500 MHz) spectrometer . The chemical shifts () are given in p.p.m. to tetramethylsilane. The residual protonated solvent (CHCl3) was used as internal reference : 7.26 and 77.0 ppm for 1H NMR and 13CNMR, respectively.

*Optical microscopy*

Phase contrast and fluorescence images of the vesicular structures were taken in inverted microscope (Axiovert 135, objective 20 X, Carl Zeiss) connected to a charge coupled device camera (C-2700-75i, Hamamatsu Photonics), image processor (Argus-20, Hamamatsu Photonics), S-VHS video recorder (SVO-9500 MPD, Sony) and video monitor (PVM 1443, Sony).

**Table 1** NMR Data for MELs (CDCl3, 500MHz)

MEL-A MEL-B MEL-C

___________________________________

1H-NMR

(13C-NMR)

()

**D-Mannose**

H-1' 4.71 d 4.69 d 4.77 d

(C-1') (99.3) (99.3) (99.2)

H-2' 5.51 dd 5.49 dd 5.50 dd

(C-2') (68.6) (68.7) (68.8)

H-3' 5.06 dd 4.91 dd 5.09 dd

(C-3') (70.7) (73.1) (70.8)

H-4' 5.24 t 3.82 m* 5.16 dd

(C-4') (65.8) (65.6) (66.3)

H-5' 3.71 m* 3.56 m 3.53 m

(C-5') (72.4) (74.5) (74.9)

H-6' 4.23 m 4.44 m 3.70 m*

(C-6') (62.3) (63.2) (61.5)

***meso-*Erythritol**

H-1 3.75 m* 3.76 m* 3.74 m*

(C-1) (63.4) (63.5) (63.4)

H-2 3.68 m* 3.68 m 3.65 m*

(C-2) (71.9) (71.9) (72.2)

H-3' 3.74 m* 3.73 m* 3.79 m*

(C-3) (71.1) (71.1) (71.1)

H-4a 3.86 dd 3.87 dd 3.80 m*

(C-4) (72.2) (72.1) (72.0)

H-4b 3.99 dd 3.99 dd 4.03 dd

(C-4) (72.2) (72.1) (72.0)

(**Table 1** *continued*)

**Acetyl group(s)**

-CH3 2.10, 2.03 s 2.13 s 2.05 s

(20.6, 20.5) (20.7) (20.7)

-C=O (170.9, 169.6) (171.8) (170.1)

**Acyl groups**

-CH3 0.87 t (x2) 0.88 t (x2) 0.87 t (x2)

(13.9, 13.8) (13.9) (x2) (14.0) (x2)

-(CH2)n- 1.26-1.40 b 1.25-1.40 b 1.25-1.40 b

(22.4-31.7) (22.3-31.7) (22.5-31.9)

-CO-CH2- 2.22 m 2.28 m 2.21 m

(C-3' position) (33.8) (33.9) (34.0)

-CO-CH2- 2.43 m 2.39 m 2.42 m

(C-2' position) (34.0) (34.0) (34.1)

-C=O (173.8, 172.9) (173.8, 173.7) (173.6, 172.8)

Values in parenthesis mean 13C-NMR data. *Not distinguishable in 1D 1H-NMR. (*s* singlet, *d* doublet, *dd* double doublet, *t* triplet, *m* multiplet, *b* broad)
